# Supplementary material
Source: MDPI journal article supplement (https://www.mdpi.com/1996-1073/14/4/932)
Supplement: s1 [file s1]

# Using Isopropanol as a Capping Agent in the Hydrothermal Liquefaction of Kraft Lignin in Near-Critical Water

Anders Ahlbom <sup>1</sup>, Marco Maschietti <sup>2</sup>, Rudi Nielsen <sup>2</sup>, Huyen Lyckeskog <sup>1</sup>, Merima Hasani <sup>1,\*</sup> and Hans Theliander <sup>1</sup>

<sup>1</sup> Department of Chemistry and Chemical Engineering, Chalmers University of Technology, SE-412 96 Gothenburg, Sweden; anders.ahlbom@chalmers.se (A.A.); huyen@chalmers.se (H.L.); hanst@chalmers.se (H.T.)

<sup>2</sup> Department of Chemistry and Bioscience, Aalborg University, Niels Bohrs Vej 8, 6700 Esbjerg, Denmark; marco@bio.aau.dk (M.M.); rudi@bio.aau.dk (R.N.)

\* Correspondence: merima.hasani@chalmers.se; Tel.: +46-317-722-996

**Table S1.** Average temperature and pressure, and their respective ranges, during the reaction. Calculated with  $\Psi_{avg} = \int_{t_1}^{t_2} \Psi(t) dt / (t_2 - t_1)$  where  $t_2$  is the time of discharge from the reactor,  $t_1$  is the time when the injection was completed and  $\Psi$  is either the temperature or pressure. Yields of product fractions and the amount of IPA added remaining in the reactor product measured with gas chromatography with flame ionisation detector (PerkinElmer GC-FID, Clarus 690; PerkinElmer Life and Analytical Sciences, Shelton, CT, USA). The GC-FID program started at 85°C for 1 min followed by a 20°C/min heating rate to 160°C and a final hold at that temperature for 2 minutes. The column used was an Elite BAC-1 PE N9315071 and an internal standard of 1-propanol was used.

| IPA/Dry lignin [g/g]      | Nominal T [°C] | T <sub>avg</sub> [°C] | T range [°C] | P <sub>avg</sub> [bar] | P range [bar] | Char yield [%] | Precipitated solids yield [%] | ASO yield [%] | IPA remaining [%] |
|---------------------------|----------------|-----------------------|--------------|------------------------|---------------|----------------|-------------------------------|---------------|-------------------|
| <b>IPA Series</b>         |                |                       |              |                        |               |                |                               |               |                   |
| 0                         | 320            | 313                   | 283-317      | 250                    | 174-265       | 36             | 19                            | 16            | --                |
| 0.6                       | 320            | 314                   | 272-317      | 248                    | 185-261       | 31             | 27                            | 13            | 67                |
| 2.7                       | 320            | 321                   | 303-324      | 247                    | 236-262       | 20             | 33                            | 15            | 71                |
| 4.9                       | 320            | 314                   | 279-318      | 243                    | 181-259       | 27             | 36                            | 20            | 82                |
| Ref.                      | 320            | 319                   | 291-323      | 242                    | 184-257       | --             | --                            | --            | 73                |
| <b>Temperature Series</b> |                |                       |              |                        |               |                |                               |               |                   |
| 2.7                       | 290            | 293                   | 252-297      | 256                    | 190-263       | 16             | 46                            | 22            | 85                |
| 2.7                       | 320            | 321                   | 303-324      | 247                    | 236-262       | 20             | 33                            | 15            | 71                |
| 2.7                       | 335            | 334                   | 315-336      | 248                    | 224-257       | 27             | 29                            | 23            | 71                |

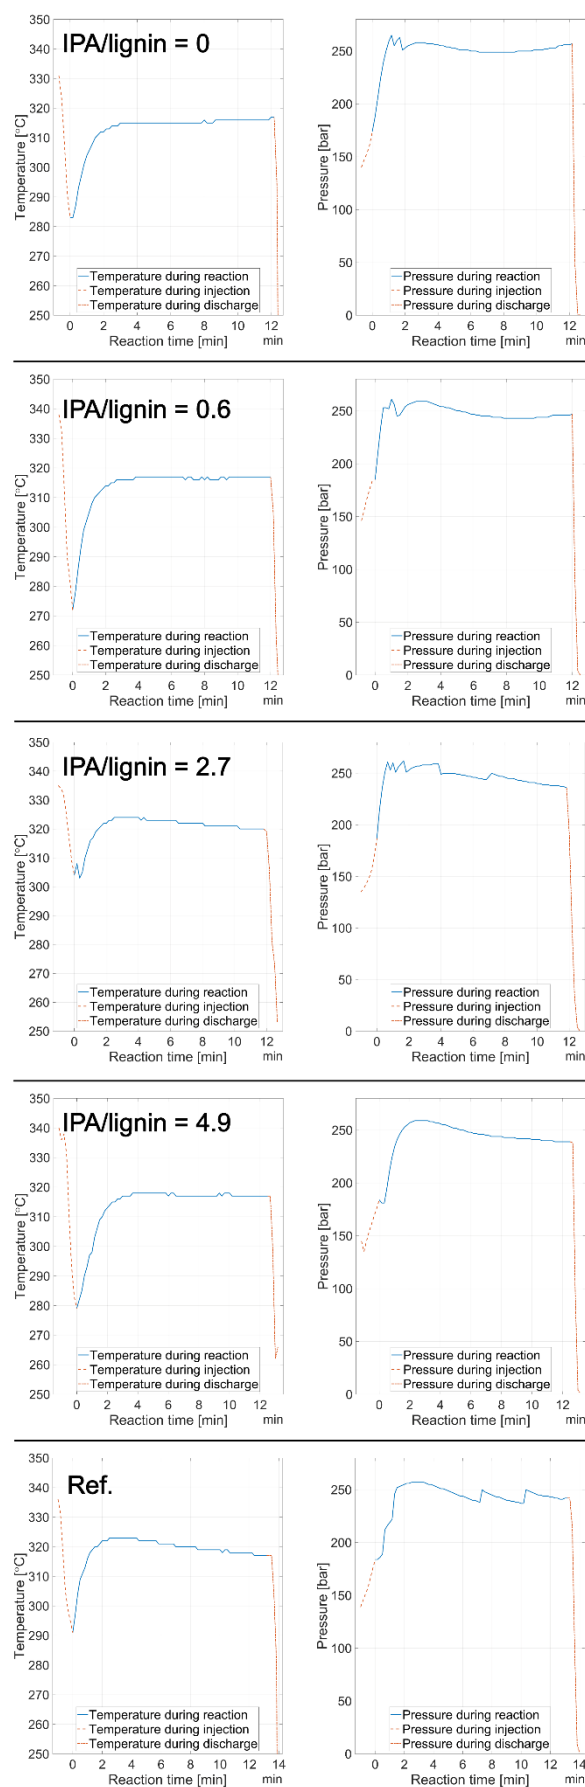

**Figure S1.** Temperature (left) and pressure (right) profiles in the reactor during injection, reaction, and discharge in the IPA series.

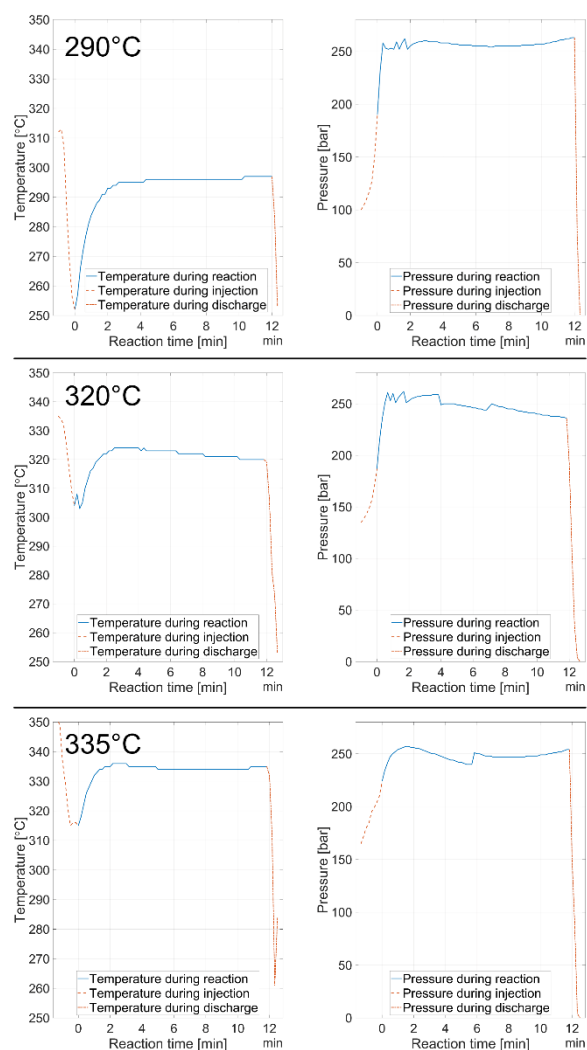

**Figure S2.** Temperature (left) and pressure (right) profiles in the reactor during injection, reaction, and discharge in the temperature series.

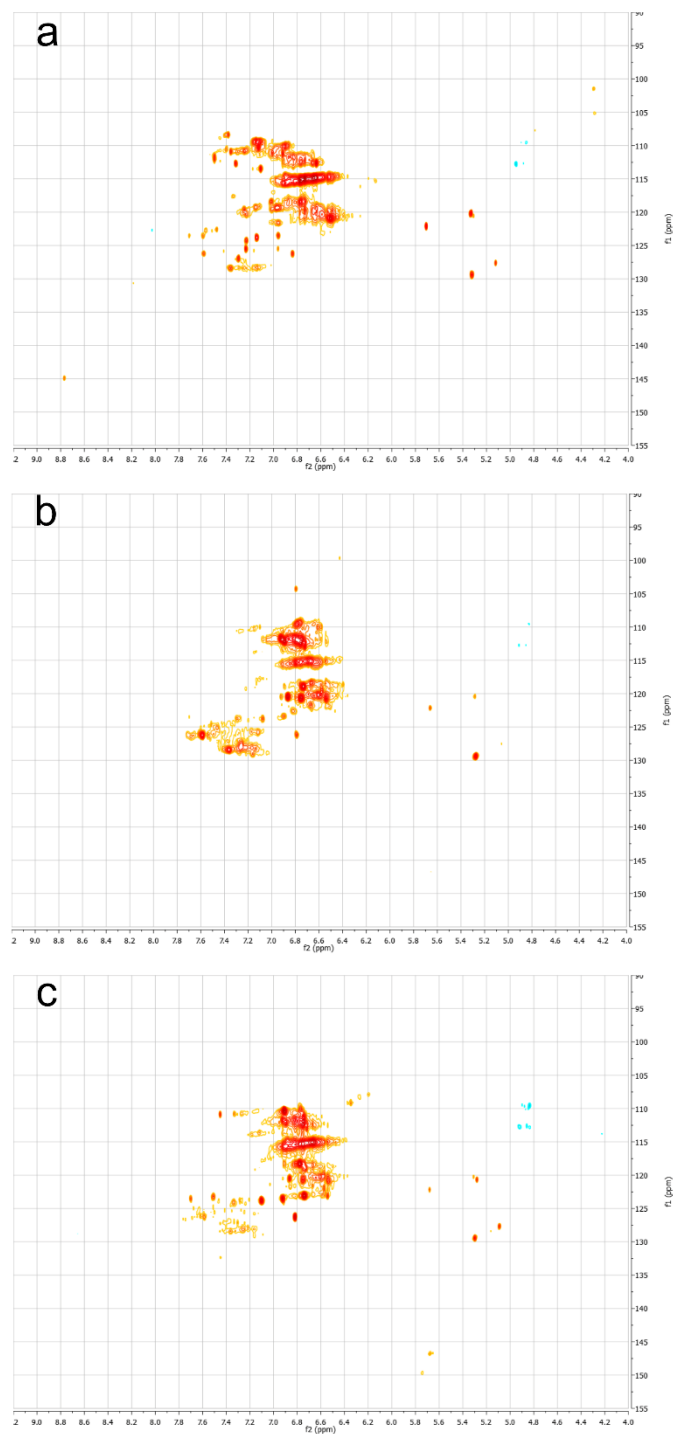

**Figure S3.** Aromatic region,  $\delta_C/\delta_H$  90-155/4.0-9.2ppm, of the heteronuclear single quantum coherence spectroscopy (HSQC) spectra of the LignoBoost lignin (a), char (b) and precipitated solids (c).

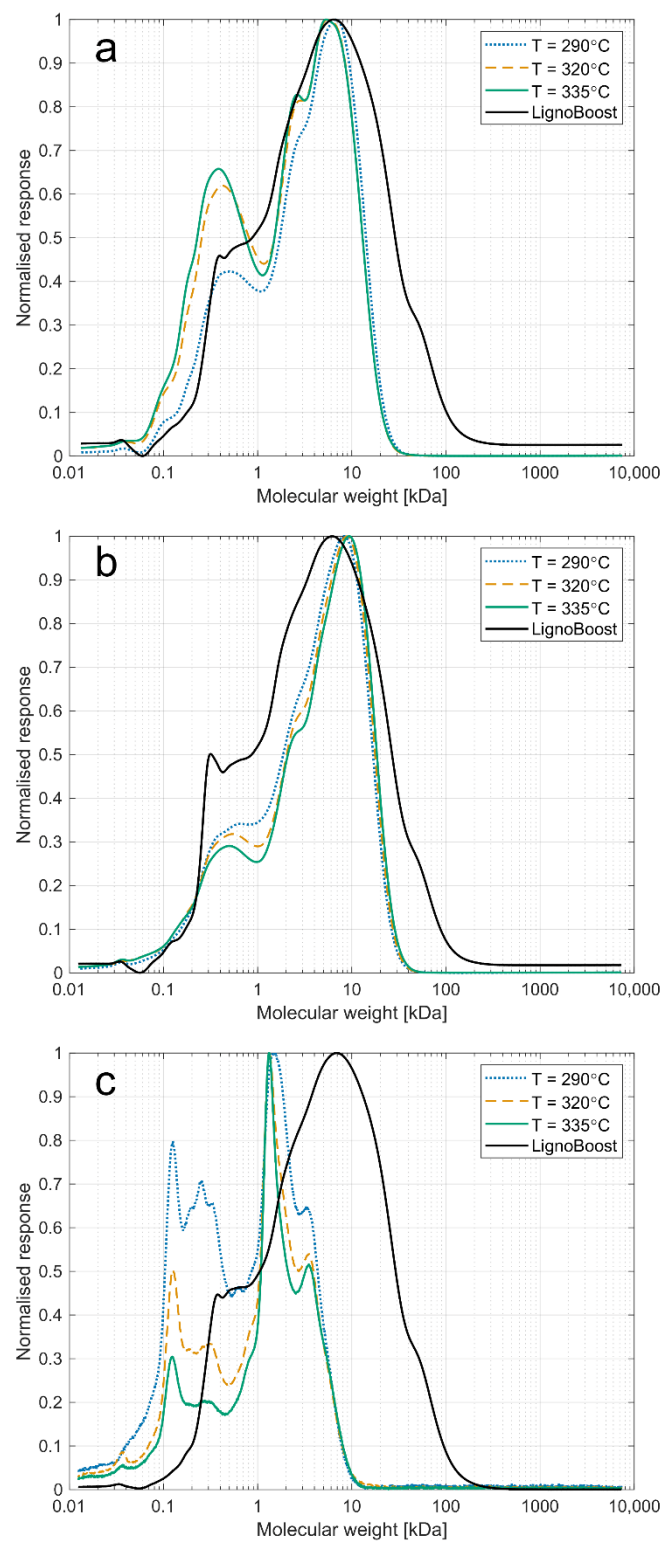

**Figure S4.** Gel permeation chromatography (GPC) chromatograms in the temperature series for char (a), precipitated solids (b) and ASO (c).

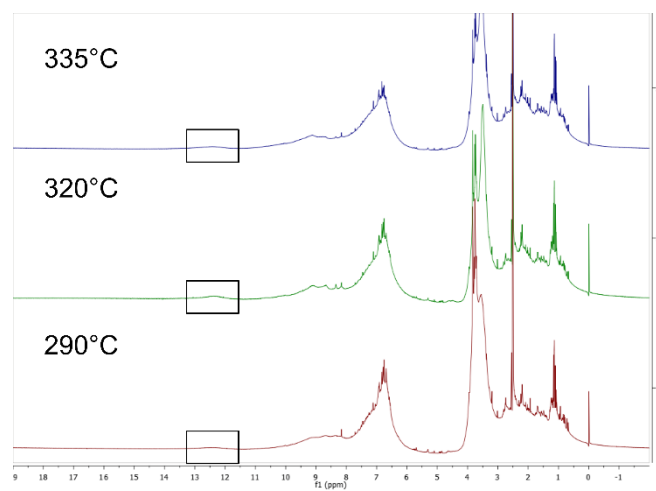

**Figure S5.** <sup>1</sup>H-NMR spectra of the precipitated solids in the temperature series: 335°C, 320°C and 290°C. The weak broad peak between 12 and 13 ppm in each spectrum, marked with a black box, represents the carboxylic acids.

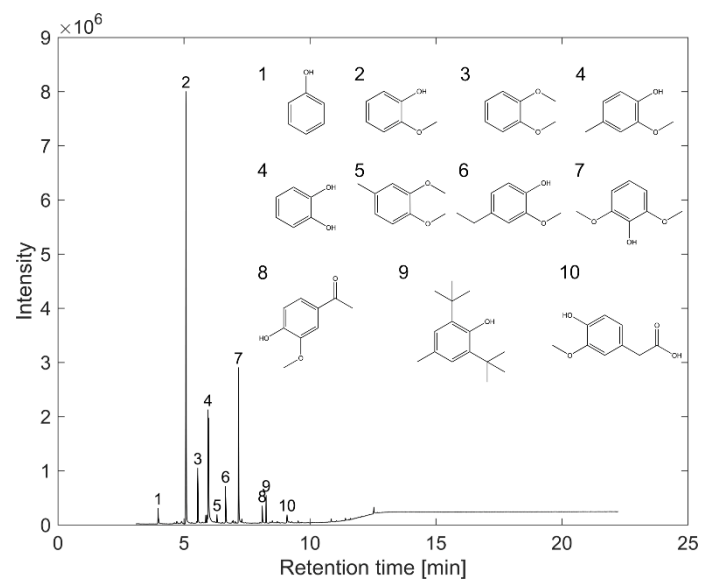

**Figure S6.** Typical gas chromatography (GC) chromatogram of the DEE-extracted ASO. Peak 4 is a mixture of creosol and catechol and therefore not properly resolved, Peak 7 is the internal standard and Peak 9 the solvent preservative.
